1           **Amplicon sequencing reveals complex infection in infants congenitally infected with**  
2                           ***Trypanosoma cruzi* and informs the dynamics of parasite transmission**

3    *Jill Hakim*<sup>1</sup>, *Andreea Waltmann*<sup>2</sup>, *Freddy Tinajeros*<sup>3</sup>, *Oksana Kharabora*<sup>4</sup>, *Edith Málaga Machaca*<sup>3,5</sup>,  
4    *Maritza Calderon*<sup>5</sup>, *María del Carmen Menduiña*<sup>6</sup>, *Jeremy Wang*<sup>7</sup>, *Daniel Rueda*<sup>8</sup>, *Mirko Zimic*<sup>5</sup> *Manuela*  
5    *Verástegui*<sup>5</sup>, *Jonathan J Juliano*<sup>2</sup>, *Robert H Gilman*<sup>9</sup>, *Monica R. Mugnier*<sup>\*1</sup>, *Natalie M Bowman*<sup>\*4</sup> *Chagas*  
6    *working group*

7    1. Department of Molecular Microbiology and Immunology, Johns Hopkins Bloomberg School of Public  
8    Health, Baltimore, Maryland, USA 2. Institute for Global Health and Infectious Disease, School of  
9    Medicine, University of North Carolina at Chapel Hill, Chapel Hill, North Carolina. 3. Asociación  
10   Benéfica PRISMA, Lima, Peru 4. Division of Infectious Diseases, Department of Medicine, University  
11   of North Carolina at Chapel Hill School of Medicine, Chapel Hill, North Carolina, USA 5. Infectious  
12   Diseases Research Laboratory, Department of Cellular and Molecular Sciences, Universidad Peruana  
13   Cayetano Heredia, Lima, Perú 6. Hospital Percy Boland Rodríguez, Ministerio de Salud Bolivia, Santa  
14   Cruz, Bolivia 7. University of North Carolina at Chapel Hill School of Medicine, Chapel Hill, North  
15   Carolina, USA 8. Facultad de Ciencias Universidad Nacional de Ingeniería Lima, Perú 9. Department of  
16   International Health, Johns Hopkins University Bloomberg School of Public Health, Baltimore, MD,  
17   USA

18    \* = co-senior author

19

20    **Abstract**

21    Congenital transmission of *Trypanosoma cruzi*, the causative agent of Chagas disease, is an  
22    important source of new infections worldwide. The mechanisms of congenital transmission  
23    remain poorly understood, but there is evidence that parasite factors could play a role.  
24    Investigating changes in parasite strain diversity during transmission could provide insight into  
25    the parasite factors that influence the process. Here we use deep amplicon sequencing of a single  
26    copy gene in the *T. cruzi* genome to evaluate the diversity of infection in a collection of clinical  
27    blood samples from Chagas positive mothers and their infected infants. We found several infants  
28    and mothers infected with more than two parasite haplotypes, indicating infection with multiple  
29    parasite strains. Two haplotypes were detected exclusively in infant samples, while one  
30    haplotype was never found in infants, suggesting a relationship between the probability of

31 transmission and parasite genotype. Finally, we found an increase in parasite population diversity  
32 in children after birth compared to their mothers, suggesting that there is no transmission  
33 bottleneck during congenital infection and that multiple parasites breach the placenta in the  
34 course of congenital transmission.

## 35 **Background**

36 *Trypanosoma cruzi* is the causative agent of Chagas disease and is estimated to infect  
37 almost 6 million people worldwide (1). Effective vector control has decreased the number of new  
38 infections, but congenital transmission has become an increasing concern, particularly in non-  
39 endemic areas. An estimated 22% of new Chagas cases occur via congenital transmission, and  
40 approximately 5% of *T. cruzi*-infected mothers will transmit the parasite to their newborn (1,2).  
41 The role that parasite genetics plays in transmission and congenital infection is poorly  
42 understood. Identifying parasite strains that are more likely to be vertically transmitted could  
43 uncover mechanisms underlying this growing source of new cases and lead to improved  
44 detection and treatment of congenital *T. cruzi* infection.

45 Studies examining parasite diversity within *T. cruzi* infections are often performed with a  
46 focus on *T. cruzi*'s six Discrete Typing Units (DTUs), TcI through TcVI, which are distinct  
47 genetic groups that segregate by genotyped markers. However, diversity has been observed  
48 within individual DTUs, both across isolates and within single infections (3–5). Therefore, using  
49 DTUs alone likely underestimates parasite diversity, as several clones of the same DTU could  
50 co-infect a patient (6,7). Moreover, *T. cruzi* has two hybrid DTUs, TcV and TcVI. Each of these  
51 are ancient hybrids of TcII and TcIII, with each homologous chromosome of the parasite thought  
52 to approximately match one of these ancestral parental haplotypes. In some parasite clones, there  
53 may be complex recombination events present between these parental haplotypes resulting in

54 mosaic alleles (8). Diversity arising from these events can only be identified by characterization  
55 of each individual haplotype. Whole genome sequencing of clinical isolates can circumvent this  
56 problem and identify complex hybrids but is typically not feasible due to the low parasitemia  
57 during chronic infection. To ameliorate the problem of low parasitemia, some studies have  
58 targeted high copy number genes, such as the miniexon locus, to evaluate the complexity of *T.*  
59 *cruzi* infection (9–11). These genes frequently display variability even within a single parasite  
60 strain, however, artificially raising the apparent number of parasite clones (3,12).

61         Here, we use amplicon sequencing of a single copy gene, *TcSC5D*, to characterize the  
62 clonal diversity in clinical samples of Chagas positive infants and mothers, including several  
63 twins. Importantly, this gene contains nucleotide polymorphisms that are distinct across several  
64 DTUs, allowing an additional rough DTU determination (13). Our results reveal haplotypes that  
65 are present exclusively in infant or mother samples, indicating a possible relationship between  
66 parasite genotype and transmission. We also observed an increase in parasite diversity in infant  
67 samples relative to maternal samples, suggesting that there is no bottleneck during congenital  
68 transmission of *T. cruzi* and that transmission may be the result of multiple colonizing parasites  
69 that infect the infant during pregnancy.

## 70 **Methods**

### 71 *Study information*

72         Chagas positive mothers were recruited from Percy Boland Women’s Hospital in Santa  
73 Cruz, Bolivia between the years of 2016 and 2018. 300 µl of maternal venous blood and 300 µl  
74 of infant blood from heel puncture was taken at birth. For longitudinal timepoints at one, three,  
75 and nine months, 300 µl of infant venous blood was taken. Mothers recruited to the study were

76 surveyed regarding obstetrics and demographic characteristics. Analysis of these epidemiological  
77 characteristics are described elsewhere (14), and epidemiological data from the patients involved  
78 in this study are provided in supplemental data (supplemental table 1). This collection protocol  
79 was approved by the ethics committee of the Bolivian Catholic University, international  
80 registration FWA 0017928 and PRISMA 00001219. Study analysis was exempted by the  
81 Institutional Review Board at the University of North Carolina at Chapel Hill (IRB 19–3014).

### 82 *Sample Processing and Amplicon Sequencing*

83 DNA was extracted at the Infectious Diseases Research Laboratory of the Universidad  
84 Peruana Cayetano Heredia in Lima, Peru. Amplicon PCR, library prep and sequencing were  
85 performed at University of North Carolina at Chapel Hill. Details of nested PCR and library  
86 preparation are described in supplementary methods. Raw sequencing data are available in  
87 National Center for Biotechnology Information (NCBI) Sequence Read Archive under accession  
88 number PRJNA891347.

### 89 *Haplotype calling*

90 Demultiplexed reads were adapter-trimmed using CutAdapt (15). Following trimming,  
91 any read pairs less than 100 base pairs long were removed to eliminate adapter dimers and off-  
92 target amplicons from the pipeline. Following adapter trimming, reads were aligned to a custom  
93 BLAST search against the target amplicon to remove non-specific reads and orient amplicons in  
94 the same direction prior to calling haplotypes. Filtered reads were then run through DADA2  
95 using a max expected error of 2 for both the R1 and R2 reads (16). Any amplicon sequence  
96 variants that made up less than 0.01% of the total population of reads were removed from the

97 analysis, and any sample that had fewer than 200 total reads after all filtering steps was removed  
98 from the analysis.

99 Two of the recovered haplotypes were identical, save for a small insertion at the end of  
100 the amplicon. Because it is possible that the shorter amplicon could be amplified in samples  
101 containing the longer amplicon, they were merged into one amplicon for the analysis. This  
102 amplicon sequence is available in the supplemental data as haplotype number 12, and it was  
103 merged with haplotype 0 for subsequent analysis.

#### 104 *Haplotype diversity analysis*

105 Parasite diversity was measured using Shannon's diversity index using the Vegan R  
106 package (17). Only haplotypes detected in both sample replicates were counted when analyzing  
107 the frequency of appearance of each haplotype, except in cases where only one sample replicate  
108 passed filtering; in these cases, every detected haplotype was counted. All scripts used to process  
109 raw data, call haplotypes, and generate figures for analysis are available at  
110 <https://github.com/MugnierLab/Hakim2022> .

## 111 **Results**

### 112 *Haplotype sequences were largely similar and mostly belonged to hybrid DTUs TcV or TcVI*

113 PCR targeting the *TcSC5D* gene was performed in duplicate on 75 total samples. After  
114 eliminating samples with low quality sequencing data, 44 samples were included in the analysis.  
115 These 44 samples included eight mother-infant sets (2 sets of twins, 6 singletons), 2 mothers  
116 without a matching infant sample, and 10 infants (including one set of twins) without a matching  
117 mother sample. All collected epidemiological data associated with these samples is available in  
118 supplemental table 1, alongside the total number of reads each sample replicate received.

119           The twelve unique haplotype sequences identified in the study population showed  
120 between 90.9% and 99.8% sequence similarity (Fig 1a). Using reference whole genome data as  
121 well as Sanger sequencing data at the same locus as a reference, we assigned each recovered  
122 haplotype a tentative DTU designation. DTU TcVI is an ancestral hybrid of a TcIII and TcII  
123 strain, and both Esmeraldo (resembling the TcIII ancestor) and non-Esmeraldo (resembling the  
124 TcII ancestor) homologous chromosomes were included as reference haplotypes. Figure 1b  
125 shows a table of all single nucleotide polymorphisms (SNPs) across the recovered haplotypes  
126 and reference sequences. Haplotype 6 shared 100% sequence identity to the TcI Sylvio strain,  
127 while all other haplotypes have some similarity to phased haplotypes of the hybrid CL Brener  
128 strain. Haplotypes 3, 8, and 11 had unique SNPs not found in the reference strains or in any other  
129 haplotype. Several haplotypes had stretches of similarity matching the TcII SNP pattern, before  
130 switching to match the TcIII pattern, and vice versa. Similarly, haplotypes 0, 3, and 8 have loci  
131 that suggest they may belong to TcII, but at site 82 all three have a nucleotide associated with  
132 TcIII. These patterns are consistent with recombination between homologous chromosomes in  
133 the hybrid strains. Though we cannot call these haplotypes' DTU designation specifically, it is  
134 apparent that they are all hybrids, making them either TcV or TcVI.

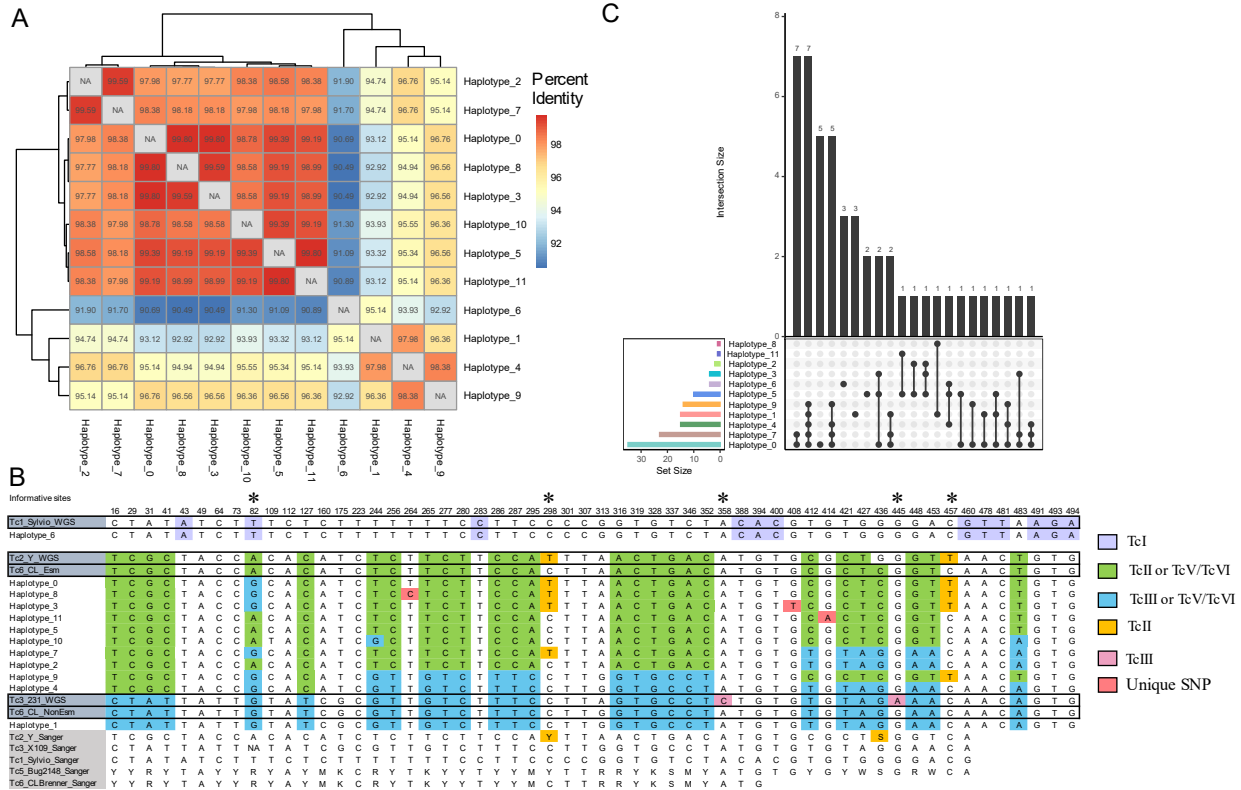

**Figure 1: Many haplotypes belonged to the same DTU. A.** Heatmap showing percent identity between haplotypes, clustered by similarity. **B** Table of all SNPs across haplotypes found. The position of each polymorphism within the amplicon is noted at the top of each column. Whole genome data of TcI, TcII, TcIII, and TcVI as well as Sanger sequencing data for a portion of the amplicon from TcI, TcII, TcIII, TcV and TcVI are included for reference. Bases are colored based on similarity to reference DTU data; only positions that are unique to a reference haplotype are colored. Asterixis denote informative SNP sites for DTU calls. **C** UpSet plot describing the frequency and co-occurrence of each haplotype and haplotype combination. Dots represent a haplotype or haplotype combination, with the frequency of that combination represented on the bar graph above.

135

136 We analyzed the combinations of haplotypes detected in each infection in order to

137 determine whether certain haplotypes were more likely to co-occur or occur alone. Four

138 haplotypes, haplotypes 0, 1, 5, and 6, were detected with no other haplotypes in some infections

139 (Fig 1b). This could indicate that these haplotypes represent individual parasite clones in which

140 both homologous chromosomes contain the same sequence at the amplicon locus. Most

141 haplotypes occur in multiple infections, suggesting that the haplotypes found in infants represent

142 parasite clones that were transmitted to the infant from the mother, rather than novel mutations  
143 arising during infection or transmission (Fig 1c). The analysis revealed 11 samples containing  
144 three or more haplotypes, which, because of *T. cruzi*'s diploid genome, likely indicates infection  
145 with at least two parasite clones. All of these samples were infant samples, with no complex  
146 infections detected in any of the 14 maternal samples (Supplemental figure 1). This finding  
147 should be interpreted with caution, however, as we used a stringent approach for haplotype  
148 counting in which haplotypes not occurring in the replicate sample are eliminated.

#### 149 *Parasite strain diversity is higher in infants than in mothers*

150         Given the presence of multiple parasite clones in many samples, we assessed the changes  
151 in parasite diversity that occur during congenital transmission. Under many modes of infectious  
152 transmission, a bottleneck occurs, and the colonized site has less strain diversity than the source.  
153 However, we find that maternal samples are less diverse, as measured by Shannon's diversity,  
154 than samples of infants at birth (Fig 2a). Shannon's diversity is more robust to sampling error  
155 than comparing the number of detected haplotypes, because it considers the proportion at which  
156 each haplotype is found(18). Diversity appears to gradually decrease as infants get older, though  
157 this effect is not statistically significant. A potential explanation for this observation could be  
158 that the low parasitemia in the maternal blood sample causes under sampling of the true maternal  
159 diversity of circulating parasites. We found that the parasitemia of each patient as measured by  
160 qPCR was correlated to the Shannon's diversity for each sample (Fig 2b). The effect was  
161 significant in the overall comparison (Spearman's rho = -0.62, p =2.3e-4), but when stratifying  
162 by sample type, the maternal samples were not significantly correlated (Spearman's rho = -0.14,  
163 p =0.75), suggesting that the maternal samples were sufficiently sampled while diversity in the  
164 infant samples may be underestimated. However, because there were no chronically infected



165 maternal samples of a high enough parasitemia to directly compare to the acutely infected infant  
166 samples, and because there may be a causative link between blood parasite load and parasite  
167 diversity, it is impossible to eliminate the role that sampling may play in the reduced parasite  
168 diversity found in mother's blood.

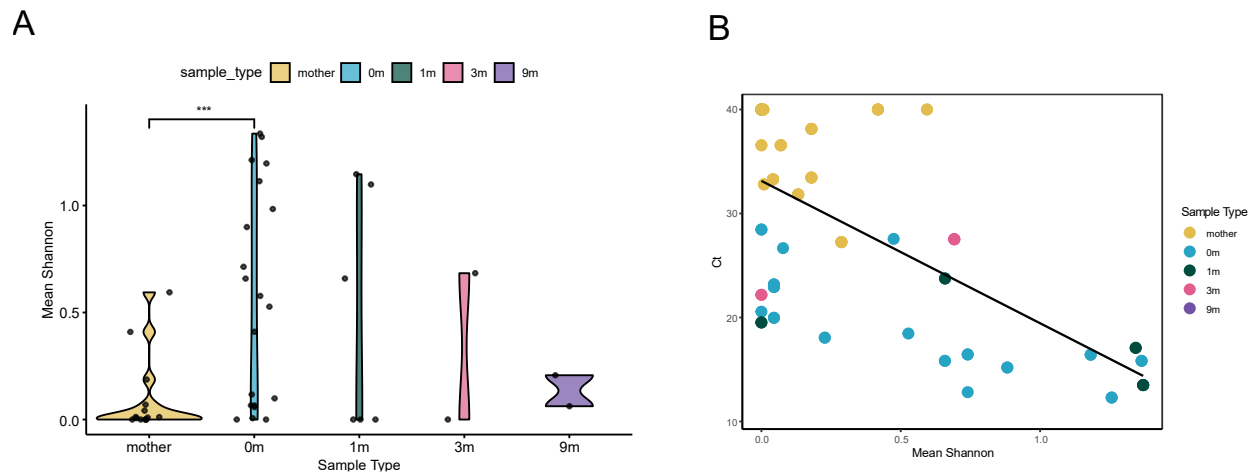

169

**Figure 2: Haplotype diversity in mothers is lower than in infants at birth.** **A.** Mean Shannon's diversity between sample replicates for each sample type. 0m is infant's sample at birth, 1m = one month of age, 3m = three months, 9m = nine months. Wilcoxon's Rank sum test,  $p = 0.0024$ . **B.** Association between parasitemia measured by CT and average Shannon's diversity for each replicate, with undetermined samples set at CT = 40. Spearman's correlation was done excluding samples with undetermined CT. Mother's samples: Spearman's  $\rho = -0.14$ ,  $p = 0.752$ . 0m samples: Spearman's  $\rho = -0.82$ ,  $p = 1.16e-4$ . Overall: Spearman's  $\rho = -0.62$ ,  $p = 2.3e-4$ .

170

171 *Several haplotypes were exclusive to the mother or the infant*

172 Parasite genetics may play a role in the probability of congenital transmission of *T. cruzi*.

173 To address this possibility, we searched for haplotypes that were more or less likely to be

174 transmitted from the mother to her infant. Haplotypes found in a mother, but not her infant, could

175 represent clones that are less likely to be congenitally transmitted. For this analysis, we counted

176 the number of times a haplotype was found in a mother, her paired infant, or in both the mother

177 and her infant (Fig 3a). Haplotypes 0, 1 and 7 appeared in both samples of some mother-infant  
178 pairs, indicating that these haplotypes were likely to be transmitted and detected in maternal  
179 blood. Haplotypes 3, 5, and 6 were only found in mothers and not paired infants. Haplotypes 4  
180 and 9 were only ever found in the infant samples of mother-infant pairs. To further explore the  
181 effect of haplotype on transmission, we also analyzed haplotype presence in samples without  
182 considering the mother-infant pairs (Fig 3b). Among these samples, haplotypes 5 and 6 were no  
183 longer exclusive to the mother and were found in some infant samples, while haplotype 3  
184 remained exclusive to mothers. Interestingly, haplotypes 4 and 9 remain exclusive to infant  
185 samples. This indicates that these haplotypes are highly likely to be transmitted, and that there  
186 may be additional biological mechanisms resulting in the lack of these haplotype's detection in  
187 the maternal blood at time of birth.

188

189

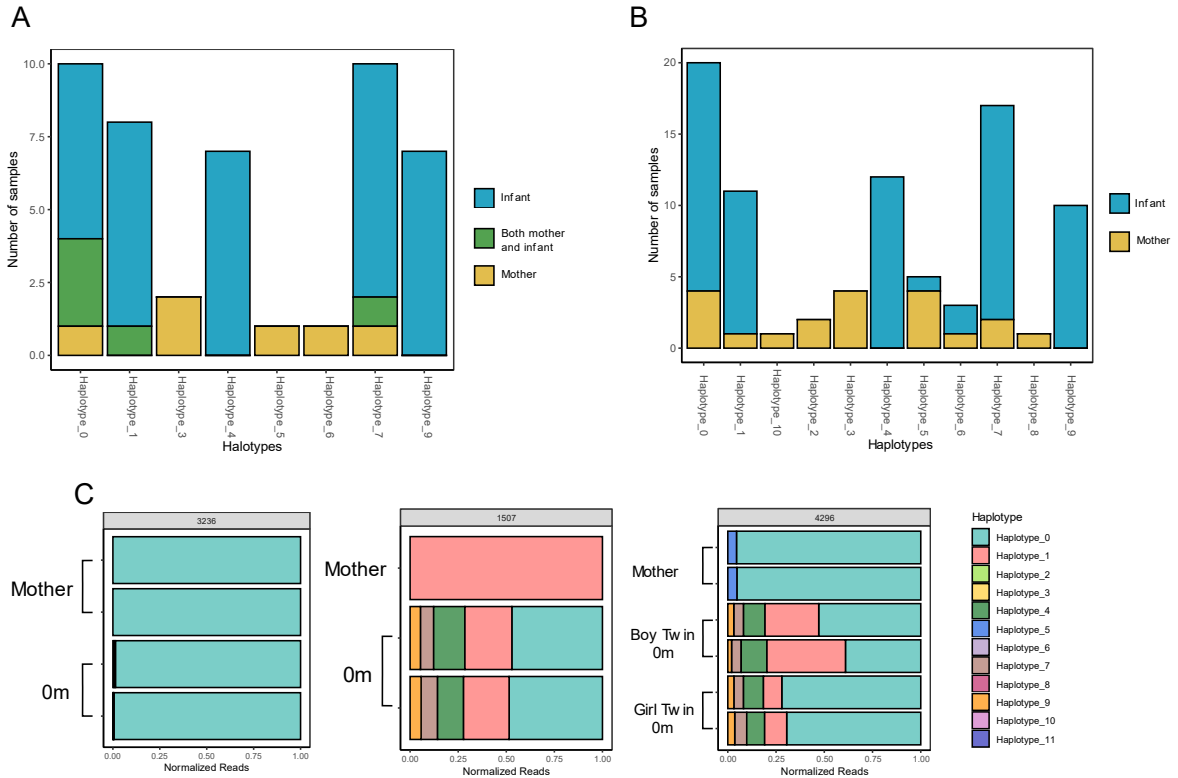

190

**Figure 3: Certain haplotypes are found only in mothers or only in infants.** **A.** Among families with paired infant-mother samples, the number of times a haplotype was found only in the mother sample, only in the newborn sample, or in both the mother and the newborn sample. **B.** Number of times a haplotype was found in any mother or any newborn, regardless of family, including samples without mother-infant pairs. **C.** Representative plots of relative haplotype abundance in each sample grouped by family. Read count was normalized to total reads in each sample.

191 Examining individual families reveals diverse transmission patterns (Fig 3c, Supplemental figure  
 192 2, and 3). Family 1507 shows the maternal detection of haplotype 1, while within the infant  
 193 sample we detect haplotype 1 in addition to several other haplotypes, consistent with our  
 194 previous observation of increased diversity in infant samples relative to mother’s samples.  
 195 Transmission within family 4296 is perhaps the most informative. In this case, two haplotypes  
 196 are detected in the maternal sample, while a larger number of haplotypes are detected in each of  
 197 the two fraternal twins. Notably, the haplotype distribution in each twin is nearly identical.

198 Because these were fraternal twins, with two separate placentas, this finding supports the  
199 hypothesis that transmission is not the result of a single inoculating incident.

## 200 **Discussion**

201 These data describe the changes in parasite diversity that exist during the process of *T.*  
202 *cruzi* congenital transmission and suggest a role for parasite genetics in the likelihood of  
203 transmission. By directly sequencing blood samples from patients and targeting a single copy  
204 gene by amplicon sequencing, we were able to identify complex infections in mother and infant  
205 samples in an endemic setting and determine changes in parasite strain diversity that occur  
206 during the process of transmission. While our findings are somewhat limited by small sample  
207 sizes, our approach allows a direct assessment of parasite diversity beyond simple DTU  
208 classification and reveals new features of congenital transmission of *T. cruzi* that warrant further  
209 investigation.

210 The unique method used in this paper allows us to avoid over-estimating complexity of  
211 infection for a sample. Here we assume the single locus gene occurs twice per parasite, with a  
212 unique allele on each homologous chromosome, thereby potentially underestimating the parasite  
213 diversity. It must be stated that this assumption of exclusive diploidy may not always hold;  
214 karyotypic instability has been found in *T. cruzi*, and gene duplication occurs commonly (19,20).  
215 However, duplicated genes often encode surface genes involved in immune evasion, and the  
216 conserved metabolic gene targeted in this work is not thought to be expressed on the surface. An  
217 additional strength of this work is that parasites were sequenced directly from patient samples  
218 and did not undergo expansion and potential strain selection in culture. Thus, we avoid the  
219 possibility of selecting for clones that are better adapted to culture at the expense of the true

220 parasite diversity. This study demonstrates the feasibility of this approach for characterizing  
221 parasite diversity across congenital infection.

222         The majority of the haplotypes detected in our samples were hybrid DTUs, likely TcV  
223 considering other strain typing work from the same setting (21). In this study, we observe  
224 potential ancestral recombination events between the parental TcII and TcIII alleles in our  
225 recovered haplotypes. This suggests additional diversity exists in the hybrid strains beyond what  
226 has been sequenced in the reference CL Brener strain. Within these hybrid DTU types, we  
227 observed several haplotypes that occurred exclusively in mother or infant samples. This suggests  
228 that there may be genetic factors within DTUs that influence parasite transmission and  
229 underscores the fact that current DTU designations are insufficient to appropriately assess the  
230 diversity of parasite strains in a single infection. Investigation into specific virulence factors,  
231 either by transcriptomic or genomic analysis, rather than DTU typing, is likely to be required to  
232 uncover the factors that influence transmission. An analysis including mothers infected with a  
233 more diverse set of parasite DTUs and mothers that did not transmit to their infant may shed  
234 light on the degree to which DTU alone can influence the probability of transmission.

235         While parasite genetics may influence the probability of transmission, our data suggest  
236 that there is no significant bottleneck at transmission, with complex infections observed in both  
237 mother and infant samples. Surprisingly, we observe an increase in parasite diversity after  
238 transmission, with many haplotypes recovered in the infant that were undetectable in maternal  
239 blood. This finding is corroborated in a similar study, where Lewellyn *et al* found novel strain  
240 types in infants compared to their paired mothers using a diverse low copy number gene (22). In  
241 that study, it was unclear whether the observed “strain types” represented individual parasite  
242 clones or diversity that was generated during infection, as the locus analyzed was a variant

243 surface protein that is likely to diversify during the course of infection. Because our approach  
244 analyzes a single-copy metabolic gene and most haplotypes were identified independently in  
245 multiple infections, we are able to more confidently assume that detected haplotypes were not  
246 the result of diversification during infection.

247 The increased diversity in the infant samples may be explained in several ways. Perhaps  
248 most intriguing is the possibility that some parasite clones prefer the placental environment,  
249 remaining undetectable in the maternal blood. If these *T. cruzi* clones are sequestered in the  
250 placenta, they might not circulate at detectable levels in the mother's blood. A previous study  
251 performed kDNA PCR on Chagas positive mothers and found multiple patients with negative  
252 bloodstream but positive placental PCR, and in two cases found placental minicircle fragments  
253 that were not detectable in the bloodstream of the same patient, suggesting placental tropism for  
254 specific parasite clones (23). Placental tropism of specific *T. cruzi* strains has also been observed  
255 in mouse models of infection (24,25).

256 An additional explanation is that parasite transmission occurs throughout pregnancy. If  
257 parasite clones cross the placenta during multiple waves of infection, the composition in the  
258 circulation of the infant would reflect the set of parasite clones present in the mother throughout  
259 pregnancy, even if these clones are absent from the mother's circulation at the time of delivery. It  
260 is possible that waves of parasitemia lead to the expansion of different parasite clones at different  
261 time points in the maternal blood during pregnancy, and that clones found in the maternal blood  
262 at birth may not represent the true diversity of parasite clones infecting the mother.

263 While compelling biological explanations for this observed increase in diversity exist, it  
264 remains possible that this observation is simply a matter of sampling. The lower parasitemia of  
265 chronically infected mothers means that fewer parasites are sampled from mothers for

266 sequencing, potentially biasing diversity estimates. While our other analyses suggest that mother  
267 samples are not undersampled, a correlation between parasitemia and Shannon's diversity means  
268 we cannot preclude this possibility.

269       Importantly, however, the observation of complex infections in infants is not affected by  
270 these issues. If infants are infected with multiple clones, regardless of each clone's presence in  
271 the mother, this is most likely the result of several parasites successfully colonizing the infant.  
272 Little is known about the dynamics of congenital transmission of *T. cruzi*, but the relatively low  
273 rate of congenital transmission compared to other parasitic congenital infection such as  
274 toxoplasmosis (~5% for Chagas compared to as high as 65% for acute toxoplasmosis (26)) might  
275 suggest that it occurs as a result of a single parasite occasionally breaching the placental barrier.  
276 Contrary to this model, our data suggest that congenital infection is the result of several parasites  
277 infecting the infant. The parasite profile from fraternal twin samples, distinct from the mother but  
278 identical between siblings, supports this model of transmission. Each of the two placentas were  
279 infected with the same set of clones, probably during multiple independent infection events  
280 during their gestation. The temporal dynamics of this process remain unclear. Parasites may  
281 cross the placenta at certain times during infection, which is in line with previous reports  
282 showing that parasitemia during the third trimester is most predictive of congenital infection  
283 (23). Alternatively, parasite clones might cross the placenta during multiple waves of infection.  
284 Why transmission of multiple parasites occurs in some pregnancies, while most others result in  
285 no infection, will be a central question going forward. The fact that multiple parasites cross the  
286 placenta suggests that host factors, including the integrity of the placental barrier and the potency  
287 of the maternal immune response, likely influence the probability of transmission.

288           This study defines the changes in parasite diversity that occur during congenital  
289 transmission and raises interesting questions about the mechanism of the process. We find no  
290 evidence of a transmission bottleneck during congenital infection, which, together with  
291 haplotype data from the fraternal twins in this study, support a model whereby multiple parasites  
292 colonize the infant during pregnancy. Moreover, we detect two haplotypes unique to newborn  
293 samples that were not detected in maternal peripheral blood, which together with previously  
294 published data suggest a link between parasite genetics and transmission probability (6).  
295 Understanding the mechanisms influencing transmission of *T. cruzi* may help inform better  
296 diagnostics and lead to more effective treatment, limiting the global burden of Chagas disease.

297

298

## 299 REFERENCES

- 300 1. Chagas disease in Latin America: an epidemiological update based on 2010 estimates. *Wkly*  
301 *Epidemiol Rec.* 2015 Feb 6;90(6):33–43.
- 302 2. Howard EJ, Xiong X, Carlier Y, Sosa-Estani S, Buekens P. Frequency of the congenital  
303 transmission of *Trypanosoma cruzi*: a systematic review and meta-analysis. *BJOG Int J Obstet*  
304 *Gynaecol.* 2014 Jan;121(1):22–33.
- 305 3. Cura CI, Mejía-Jaramillo AM, Duffy T, Burgos JM, Rodriguero M, Cardinal MV, et al.  
306 *Trypanosoma cruzi* I genotypes in different geographical regions and transmission cycles  
307 based on a microsatellite motif of the intergenic spacer of spliced-leader genes. *Int J Parasitol.*  
308 2010 Dec 1;40(14):1599–607.
- 309 4. Llewellyn MS, Rivett-Carnac JB, Fitzpatrick S, Lewis MD, Yeo M, Gaunt MW, et al.  
310 Extraordinary *Trypanosoma cruzi* diversity within single mammalian reservoir hosts implies a  
311 mechanism of diversifying selection. *Int J Parasitol.* 2011 May 1;41(6):609–14.
- 312 5. Reis-Cunha JL, Baptista RP, Rodrigues-Luiz GF, Coqueiro-dos-Santos A, Valdivia HO, de  
313 Almeida LV, et al. Whole genome sequencing of *Trypanosoma cruzi* field isolates reveals  
314 extensive genomic variability and complex aneuploidy patterns within TcII DTU. *BMC*  
315 *Genomics.* 2018 Nov 13;19(1):816.



- 316 6. Herrera C, Truyens C, Dumonteil E, Alger J, Sosa-Estani S, Cafferata ML, et al. Phylogenetic  
317 Analysis of *Trypanosoma cruzi* from Pregnant Women and Newborns from Argentina,  
318 Honduras, and Mexico Suggests an Association of Parasite Haplotypes with Congenital  
319 Transmission of the Parasite. *J Mol Diagn JMD*. 2019 Nov;21(6):1095–105.
- 320 7. Bowman NM, Balasubramanian S, Gilman RH, Parobek C, Calderon M, Waltmann A, et al.  
321 Deep Sequencing to Detect Diversity of *Trypanosoma cruzi* Infection in Patients Coinfected  
322 With Human Immunodeficiency Virus and Chagas Disease. *J Infect Dis*. 2022 Jan  
323 15;225(2):243–7.
- 324 8. Westenberger SJ, Barnabé C, Campbell DA, Sturm NR. Two Hybridization Events Define the  
325 Population Structure of *Trypanosoma cruzi*. *Genetics*. 2005 Oct 1;171(2):527–43.
- 326 9. Burgos JM, Altcheh J, Bisio M, Duffy T, Valadares HMS, Seidenstein ME, et al. Direct  
327 molecular profiling of minicircle signatures and lineages of *Trypanosoma cruzi* bloodstream  
328 populations causing congenital Chagas disease. *Int J Parasitol*. 2007 Oct;37(12):1319–27.
- 329 10. Villanueva-Lizama L, Teh-Poot C, Majeau A, Herrera C, Dumonteil E. Molecular  
330 Genotyping of *Trypanosoma cruzi* by Next-Generation Sequencing of the Mini-Exon Gene  
331 Reveals Infections With Multiple Parasite Discrete Typing Units in Chagasic Patients From  
332 Yucatan, Mexico. *J Infect Dis*. 2019 May 24;219(12):1980–8.
- 333 11. Murillo-Solano C, Ramos-Ligonio A, López-Monteon A, Guzmán-Gómez D, Torres-  
334 Montero J, Herrera C, et al. Diversity of *Trypanosoma cruzi* parasites infecting *Triatoma*  
335 *dimidiata* in Central Veracruz, Mexico, and their One Health ecological interactions. *Infect*  
336 *Genet Evol J Mol Epidemiol Evol Genet Infect Dis*. 2021 Nov;95:105050.
- 337 12. Maiguashca Sánchez J, Suetto SOB, Schwabl P, Grijalva MJ, Llewellyn MS, Costales JA.  
338 Remarkable genetic diversity of *Trypanosoma cruzi* and *Trypanosoma rangeli* in two  
339 localities of southern Ecuador identified via deep sequencing of mini-exon gene amplicons.  
340 *Parasit Vectors*. 2020 May 14;13(1):252.
- 341 13. Cosentino RO, Agüero F. A Simple Strain Typing Assay for *Trypanosoma cruzi*:  
342 Discrimination of Major Evolutionary Lineages from a Single Amplification Product. *PLoS*  
343 *Negl Trop Dis*. 2012 Jul 31;6(7):e1777.
- 344 14. Klein MD, Tinajeros F, del Carmen Menduñá M, Málaga E, Condori BJ, Verástegui M,  
345 et al. Risk Factors for Maternal Chagas Disease and Vertical Transmission in a Bolivian  
346 Hospital. *Clin Infect Dis*. 2021 Oct 1;73(7):e2450–6.
- 347 15. Martin M. Cutadapt removes adapter sequences from high-throughput sequencing reads.  
348 *EMBnet.journal*. 2011 May 2;17(1):10–2.
- 349 16. DADA2: High-resolution sample inference from Illumina amplicon data | Nature  
350 Methods [Internet]. [cited 2022 Aug 21]. Available from:  
351 <https://www.nature.com/articles/nmeth.3869>

- 352 17. Helene Wagner JO. Vegan: community ecology package [Internet]. 2019. Available  
353 from: <http://CRAN.R-project.org/package=vegan>
- 354 18. He Y, Zhou BJ, Deng GH, Jiang XT, Zhang H, Zhou HW. Comparison of microbial  
355 diversity determined with the same variable tag sequence extracted from two different PCR  
356 amplicons. *BMC Microbiol*. 2013 Sep 14;13(1):208.
- 357 19. Talavera-López C, Messenger LA, Lewis MD, Yeo M, Reis-Cunha JL, Matos GM, et al.  
358 Repeat-Driven Generation of Antigenic Diversity in a Major Human Pathogen, *Trypanosoma*  
359 *cruzi*. *Front Cell Infect Microbiol* [Internet]. 2021 [cited 2022 Apr 18];11. Available from:  
360 <https://www.frontiersin.org/article/10.3389/fcimb.2021.614665>
- 361 20. Matos GM, Lewis MD, Talavera-López C, Yeo M, Grisard EC, Messenger LA, et al.  
362 Microevolution of *Trypanosoma cruzi* reveals hybridization and clonal mechanisms driving  
363 rapid genome diversification. Claessens A, van der Meer JW, Lukes J, Agüero F, editors.  
364 *eLife*. 2022 May 10;11:e75237.
- 365 21. Sanchez L, Messenger LA, Bhattacharyya T, Gilman RH, Mayta H, Colanzi R, et al.  
366 Congenital Chagas disease in Santa Cruz Department, Bolivia, is dominated by *Trypanosoma*  
367 *cruzi* lineage V. *Trans R Soc Trop Med Hyg*. 2021 Jun 16;116(1):80–4.
- 368 22. Llewellyn MS, Messenger LA, Luquetti AO, Garcia L, Torrico F, Tavares SBN, et al.  
369 Deep Sequencing of the *Trypanosoma cruzi* GP63 Surface Proteases Reveals Diversity and  
370 Diversifying Selection among Chronic and Congenital Chagas Disease Patients. *PLoS Negl*  
371 *Trop Dis*. 2015 Apr 7;9(4):e0003458.
- 372 23. Bisio M, Seidenstein ME, Burgos JM, Ballering G, Risso M, Pontoriero R, et al.  
373 Urbanization of congenital transmission of *Trypanosoma cruzi*: prospective polymerase chain  
374 reaction study in pregnancy. *Trans R Soc Trop Med Hyg*. 2011 Oct;105(10):543–9.
- 375 24. Andrade SG. The influence of the strain of *Trypanosoma cruzi* in placental infections in  
376 mice. *Trans R Soc Trop Med Hyg*. 1982;76(1):123–8.
- 377 25. Juiz NA, Solana ME, Acevedo GR, Benatar AF, Ramirez JC, Costa PA da, et al.  
378 Different genotypes of *Trypanosoma cruzi* produce distinctive placental environment genetic  
379 response in chronic experimental infection. *PLoS Negl Trop Dis*. 2017 Mar 8;11(3):e0005436.
- 380 26. McAuley JB. Congenital Toxoplasmosis. *J Pediatr Infect Dis Soc*. 2014 Sep;3(Suppl  
381 1):S30–5.

382

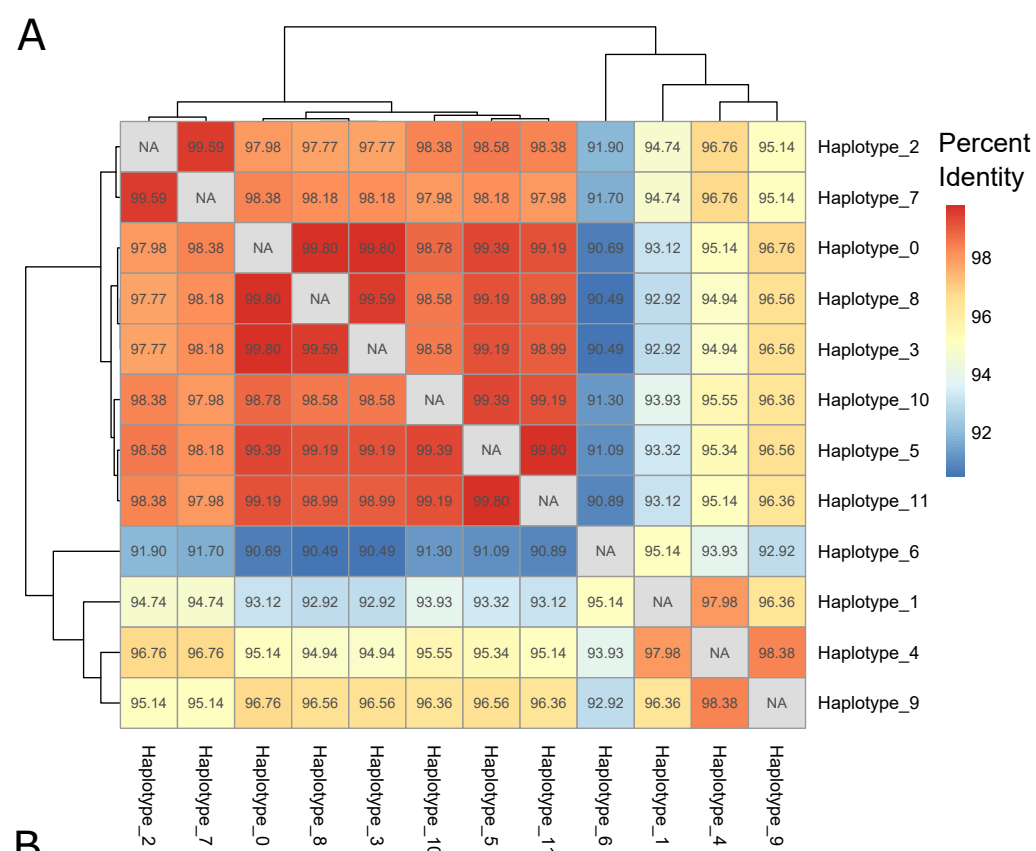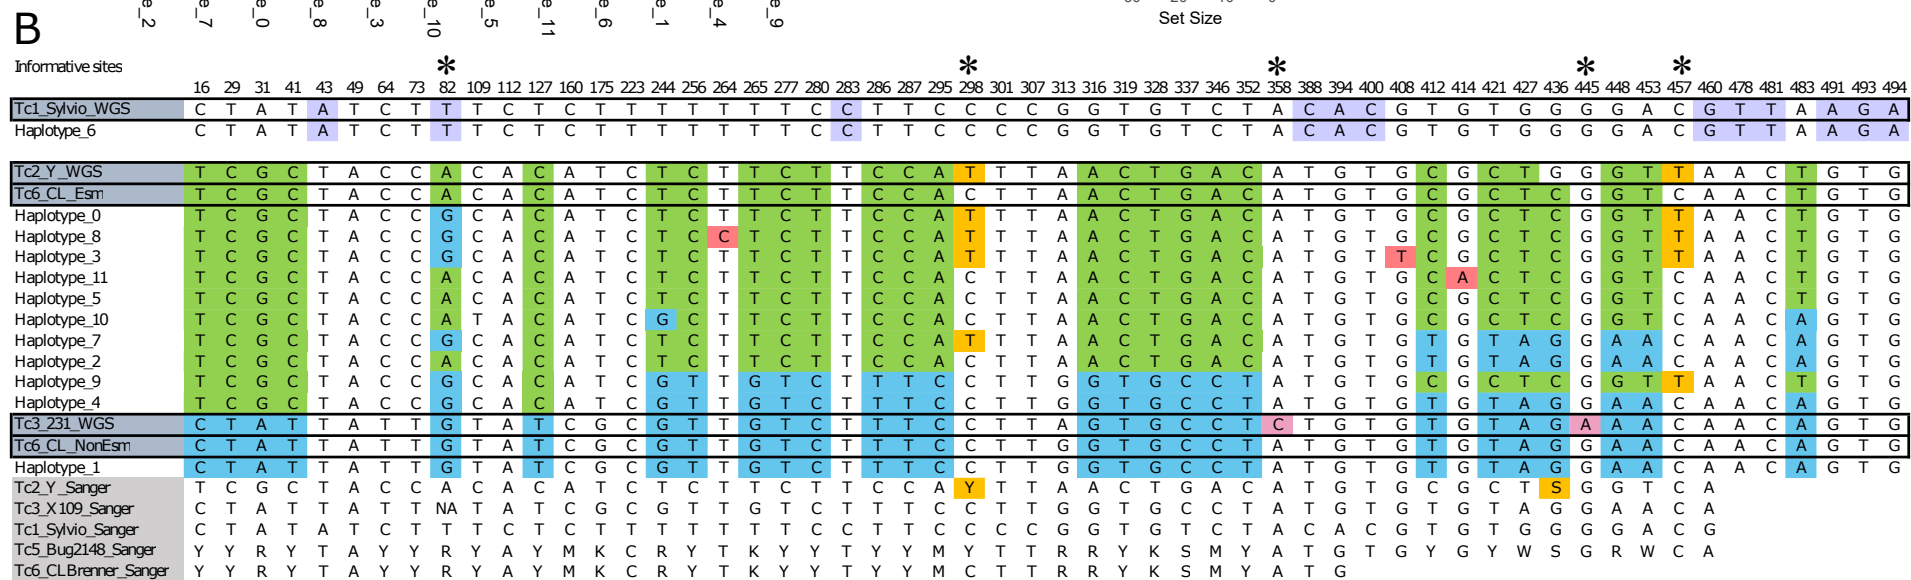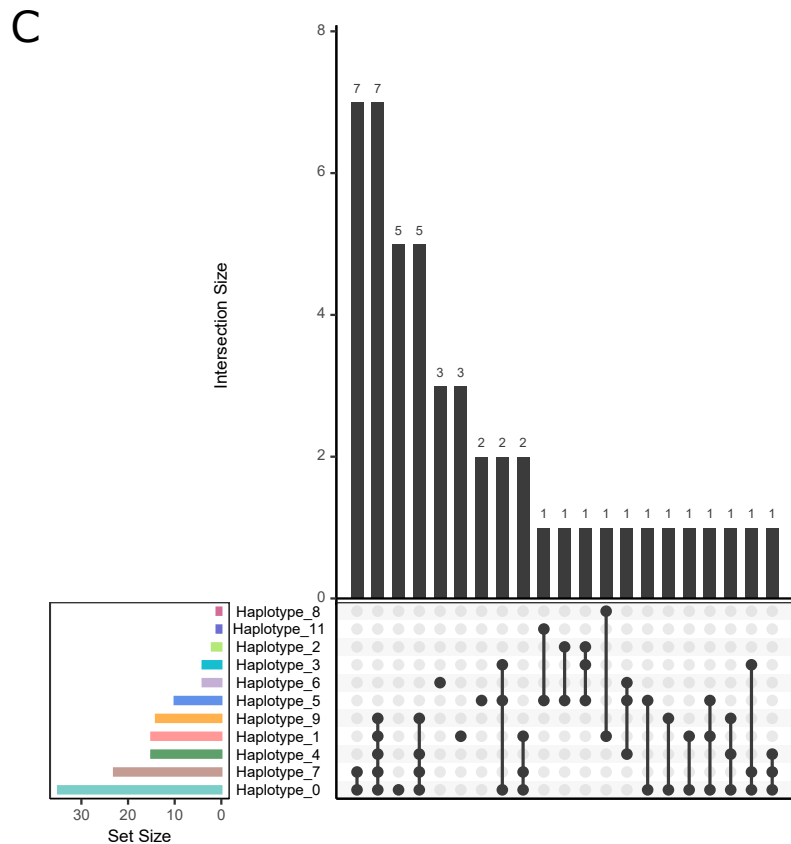



**A**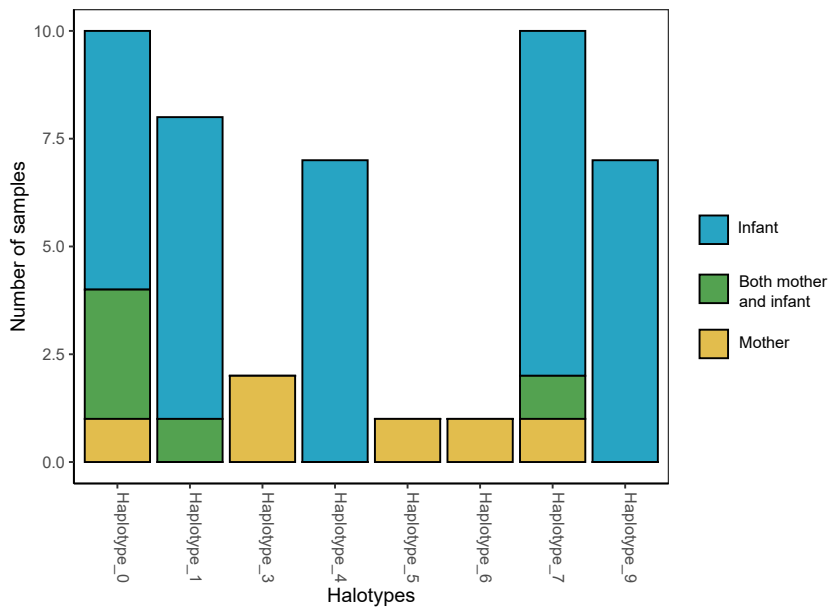**B**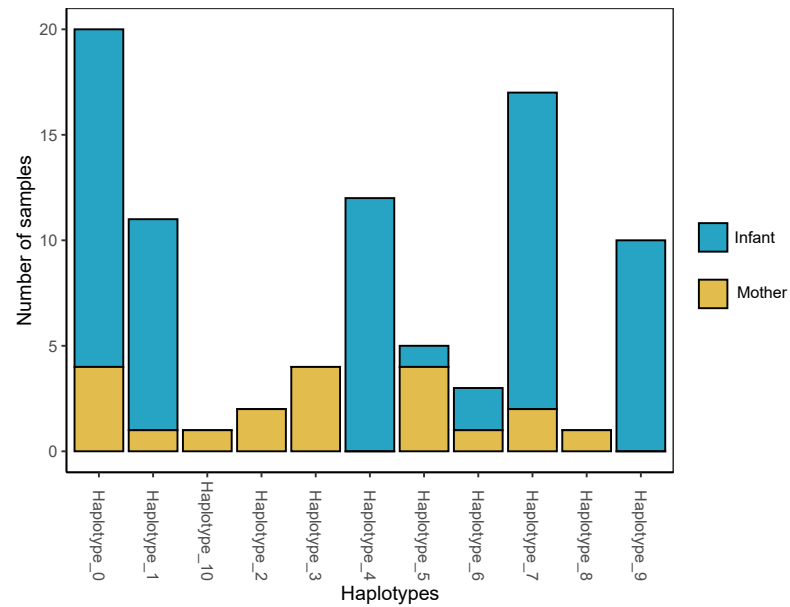**C**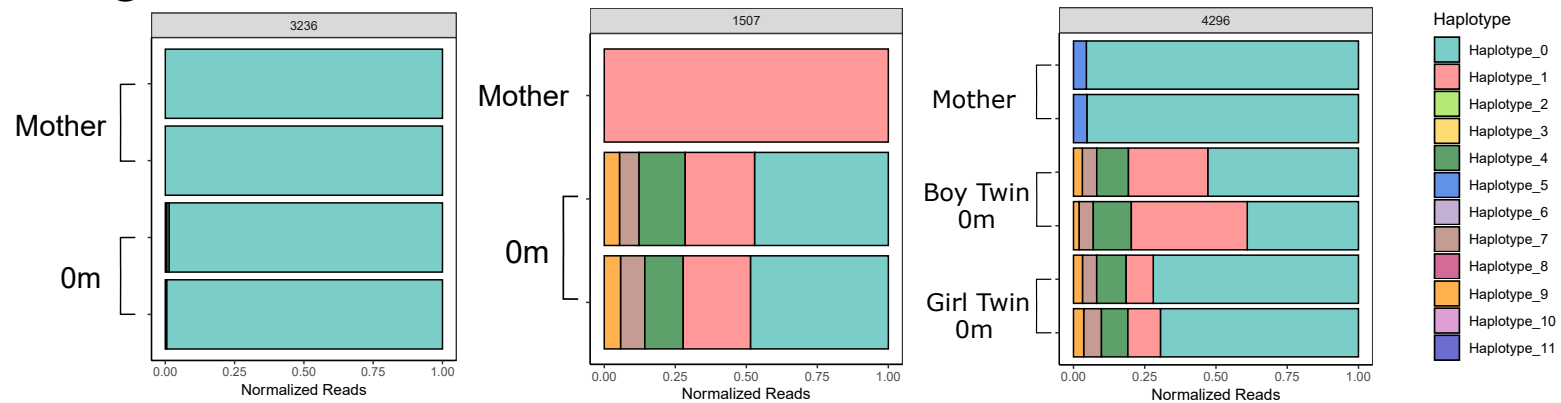

Source: https://www.biorxiv.org/content/biorxiv/early/2022/11/16/2022.11.16.516746.full.pdf
